# Supplementary material
Source: MDPI journal article supplement (https://www.mdpi.com/2073-4352/2/3/1283)

# Supplementary Material

**Table S1.** Crystallographic parameters and data collection details.

| Identification code                              | 1Cl (RT)                                                                                               | 1Cl (260K)                                                   |
|--------------------------------------------------|--------------------------------------------------------------------------------------------------------|--------------------------------------------------------------|
| Empirical formula                                | (C <sub>12</sub> H <sub>10</sub> S <sub>6</sub> N <sub>2</sub> ) (Au Cl <sub>2</sub> ) <sub>0.94</sub> |                                                              |
| Formula weight                                   | 625.70                                                                                                 |                                                              |
| Temperature                                      | 293(2) K                                                                                               | 260(2) K                                                     |
| Wavelength                                       | 0.71073 Å (Mo Kα)                                                                                      | 1.54178 Å (Cu Kα)                                            |
| Crystal system                                   | Tetragonal                                                                                             |                                                              |
| Space Group                                      | <i>I</i> -42 <i>d</i>                                                                                  |                                                              |
| Unit cell dimensions                             | <i>a</i> = 7.3260(1) Å, <i>α</i> = 90°                                                                 | <i>a</i> = 7.3066 (1) Å, <i>α</i> = 90°                      |
|                                                  | <i>b</i> = 7.3260(1) Å, <i>β</i> = 90°                                                                 | <i>b</i> = 7.30660 (1) Å, <i>β</i> = 90°                     |
|                                                  | <i>c</i> = 67.5487(12) Å, <i>γ</i> = 90°                                                               | <i>c</i> = 67.3719 (12) Å, <i>γ</i> = 90°                    |
| Volume                                           | 3625.3(1) Å <sup>3</sup>                                                                               | 3596.7(1)                                                    |
| Z                                                | 8                                                                                                      |                                                              |
| Calculated density                               | 2.293 mg/m <sup>3</sup>                                                                                | 2.31 mg/m <sup>3</sup>                                       |
| Absorption coefficient                           | 8.577 mm <sup>-1</sup>                                                                                 | 23.504                                                       |
| F(000)                                           | 2384                                                                                                   |                                                              |
| Crystal size                                     | 0.63 × 0.50 × 0.06mm                                                                                   |                                                              |
| Theta range for data collection                  | 3.16 to 27.47°                                                                                         | 6.89 to 64.92°                                               |
| Limiting indices                                 | -7 ≤ <i>h</i> ≤ 7, -8 ≤ <i>k</i> ≤ 9,<br>-68 ≤ <i>l</i> ≤ 87                                           | -4 ≤ <i>h</i> ≤ 7, -8 ≤ <i>k</i> ≤ 8,<br>-76 ≤ <i>l</i> ≤ 78 |
| Reflections collected/unique                     | 5696/2058 [ <i>R</i> (int) = 0.0355]                                                                   | 11949/1526 [ <i>R</i> (int) = 0.0481]                        |
| Completeness to theta 27.47                      | 98.4%                                                                                                  | 98.7%                                                        |
| Absorption correction                            | Empirical                                                                                              | Numerical                                                    |
| Max. and min. transmission                       | 0.6271 and 0.0994                                                                                      | 1.0000 and 0.0288                                            |
| Refinement method                                | Full-matrix least-squares<br>on <i>F</i> <sup>2</sup>                                                  |                                                              |
| Data/restraints/parameters                       | 2058/1/115                                                                                             | 1526/1/114                                                   |
| Goodness-of-fit on <i>F</i> <sup>2</sup>         | 1.067                                                                                                  | 1.113                                                        |
| Final R indices [ <i>I</i> > 2sigma( <i>I</i> )] | <i>R</i> 1 = 0.0441, w <i>R</i> 2 = 0.1031 <sup>a</sup>                                                | <i>R</i> 1 = 0.0455, w <i>R</i> 2 = 0.1090 <sup>a</sup>      |
| R indices (all data)                             | <i>R</i> 1 = 0.0501, w <i>R</i> 2 = 0.1075 <sup>a</sup>                                                | <i>R</i> 1 = 0.0490, w <i>R</i> 2 = 0.1110 <sup>a</sup>      |
| Absolute structure parameter                     | 0.53(2)                                                                                                | 0.49(4)                                                      |
| Largest diff. peak and hole                      | 1.661 and -1.984 e Å <sup>-3</sup>                                                                     | 1.530 and -2.344 e Å <sup>-3</sup>                           |

<sup>a</sup>  $R_1 = \Sigma(|F_o| - |F_c|)/\Sigma(|F_o|)$  and  $wR_2 = \{\Sigma[w(F_o^2 - F_c^2)^2]/\Sigma[w(F_o^2)^2]\}^{1/2}$ ,  $w = 1/[\sigma^2(F_o^2) + (aP)^2 + bP]$  and  $P = ((\max F_o^2, 0) + 2F_c^2)/3$ ;  $a = 0.0339$ ,  $b = 22.02$  for 1Cl(RT) and  $a = 0.0341$ ,  $b = 55.02$  for 1Cl(260 K).

**Table S2.** Atomic coordinates ( $\times 10^4$ ) and equivalent isotropic displacement parameters ( $\text{\AA}^2 \times 10^3$ ) for **1Cl** (RT).  $U(\text{eq})$  is defined as one third of the trace of the orthogonalized  $U_{ij}$  tensor.

|       | $x$      | $y$      | $z$      | $U(\text{eq})$ |
|-------|----------|----------|----------|----------------|
| Au(1) | <b>0</b> | <b>0</b> | <b>0</b> | <b>122(1)</b>  |
| Cl(1) | 0        | 0        | 344(1)   | 105(1)         |
| S(1)  | −2423(1) | 4998(5)  | 783(1)   | 35(1)          |
| S(2)  | −1972(1) | 5003(5)  | 352(1)   | 33(1)          |
| S(3)  | −2007(1) | 4998(5)  | −124(1)  | 36(1)          |
| C(1)  | −366(15) | 2329(9)  | 976(1)   | 59(3)          |
| C(2)  | −832(8)  | 4383(8)  | 979(1)   | 37(1)          |
| C(3)  | −931(6)  | 4921(17) | 583(1)   | 25(1)          |
| C(4)  | 0        | 5000     | 215(1)   | 27(1)          |
| C(6)  | −949(6)  | 4975(18) | −355(1)  | 29(1)          |
| C(5)  | 0        | 5000     | 13(1)    | 26(1)          |
| N(1)  | −1935(5) | 4915(16) | −520(1)  | 38(1)          |
| C(7)  | −928(6)  | 5000(20) | −688(1)  | 39(1)          |
| Au(2) | 5000     | 5000     | 1255(1)  | 398(12)        |
| Cl(2) | 5053(14) | 1890(20) | 1268(3)  | 143(16)        |

**Table S3.** Bond lengths [ $\text{\AA}$ ] and angles [ $^\circ$ ] for **1Cl** (RT).

|                           |           |
|---------------------------|-----------|
| Au(1)-Cl(1) <sup>#1</sup> | 2.323(4)  |
| Au(1)-Cl(1)               | 2.323(4)  |
| S(1)-C(3)                 | 1.742(4)  |
| S(1)-C(2)                 | 1.818(6)  |
| S(2)-C(4)                 | 1.717(3)  |
| S(2)-C(3)                 | 1.735(4)  |
| S(3)-C(5)                 | 1.736(3)  |
| S(3)-C(6)                 | 1.746(4)  |
| C(1)-C(2)                 | 1.543(9)  |
| C(1)-H(1A)                | 0.96      |
| C(1)-H(1B)                | 0.96      |
| C(1)-H(1C)                | 0.96      |
| C(2)-C(2) <sup>#2</sup>   | 1.518(12) |
| C(2)-H(2)                 | 0.98      |
| C(3)-C(3) <sup>#2</sup>   | 1.369(9)  |
| C(4)-C(5)                 | 1.365(6)  |
| C(4)-S(2) <sup>#2</sup>   | 1.717(3)  |
| C(6)-N(1)                 | 1.327(5)  |
| C(6)-C(6) <sup>#2</sup>   | 1.390(8)  |
| C(5)-S(3) <sup>#2</sup>   | 1.736(3)  |
| N(1)-C(7)                 | 1.355(6)  |
| C(7)-C(7) <sup>#2</sup>   | 1.359(9)  |
| C(7)-H(7)                 | 0.93      |
| C(3)-S(1)-C(2)            | 98.9(3)   |

**Table S3.** *Cont.*

|                               |            |
|-------------------------------|------------|
| C(4)-S(2)-C(3)                | 96.6(2)    |
| C(5)-S(3)-C(6)                | 95.7(2)    |
| C(2)#2-C(2)-C(1)              | 113.8(7)   |
| C(2) <sup>#2</sup> -C(2)-S(1) | 111.6(4)   |
| C(1)-C(2)-S(1)                | 112.0(5)   |
| C(2) <sup>#2</sup> -C(2)-H(2) | 106.3      |
| C(3) <sup>#2</sup> -C(3)-S(2) | 115.78(19) |
| C(3) <sup>#2</sup> -C(3)-S(1) | 128.5(2)   |
| S(2)-C(3)-S(1)                | 114.9(2)   |
| C(5)-C(4)-S(2)                | 122.73(14) |
| C(5)-C(4)-S(2) <sup>#2</sup>  | 122.74(14) |
| S(2)-C(4)-S(2) <sup>#2</sup>  | 114.5(3)   |
| N(1)-C(6)-C(6) <sup>#2</sup>  | 123.1(3)   |
| N(1)-C(6)-S(3)                | 120.6(3)   |
| C(6) <sup>#2</sup> -C(6)-S(3) | 116.35(14) |
| C(4)-C(5)-S(3) <sup>#2</sup>  | 122.11(15) |
| C(4)-C(5)-S(3)                | 122.11(15) |
| S(3) <sup>#2</sup> -C(5)-S(3) | 115.8(3)   |
| C(6)-N(1)-C(7)                | 113.8(4)   |
| N(1)-C(7)-C(7) <sup>#2</sup>  | 123.0(3)   |
| N(1)-C(7)-H(7)                | 118.5      |
| C(7) <sup>#2</sup> -C(7)-H(7) | 118.5      |

Symmetry transformations used to generate equivalent atoms: #1  $-y, x, -z$ ; #2  $-x, -y + 1, z$ .

**Table S4.** Atomic coordinates ( $\times 10^4$ ) and equivalent isotropic displacement parameters ( $\text{\AA}^2 \times 10^3$ ) for **1Cl** (260 K).  $U(\text{eq})$  is defined as one third of the trace of the orthogonalized  $U_{ij}$  tensor.

| $x$   | $y$      | $z$      | $U(\text{eq})$ | $x$     |
|-------|----------|----------|----------------|---------|
| Au(1) | 0        | 0        | 0              | 102(1)  |
| Cl(1) | 0        | 0        | 341(1)         | 91(1)   |
| S(1)  | -2429(2) | 499665)  | 784(1)         | 24(1)   |
| S(2)  | -1978(2) | 5003(6)  | 353(1)         | 23(1)   |
| S(3)  | -2012(2) | 5006(6)  | -124(1)        | 26(1)   |
| C(1)  | -414(15) | 2327(12) | 980(1)         | 39(3)   |
| C(2)  | -833(11) | 4378(20) | 980(1)         | 30(2)   |
| C(3)  | -942(8)  | 4970(20) | 584(1)         | 16(1)   |
| C(4)  | 0        | 5000     | 215(1)         | 20(2)   |
| C(6)  | -948(8)  | 4960(20) | -356(1)        | 18(1)   |
| C(5)  | 0        | 5000     | 12(1)          | 18(1)   |
| N(1)  | -1933(7) | 4940(19) | -522(1)        | 28(1)   |
| C(7)  | -937(9)  | 4990(30) | -688(1)        | 28(1)   |
| Au(2) | 5000     | 5000     | 1254(1)        | 364(16) |
| Cl(2) | 5060(20) | 1870(20) | 1263(3)        | 110(20) |

**Table S5.** Bond lengths [Å] and angles [°] for **1Cl** (260 K).

|                               |            |
|-------------------------------|------------|
| Au(1)-Cl(1) <sup>#1</sup>     | 2.296(5)   |
| Au(1)-Cl(1)                   | 2.296(5)   |
| S(1)-C(3)                     | 1.735(5)   |
| S(1)-C(2)                     | 1.825(7)   |
| S(2)-C(4)                     | 1.721(3)   |
| S(2)-C(3)                     | 1.722(4)   |
| S(3)-C(5)                     | 1.732(4)   |
| S(3)-C(6)                     | 1.742(4)   |
| C(1)-C(2)                     | 1.533(11)  |
| C(2)-C(2) <sup>#2</sup>       | 1.518(15)  |
| C(3)-C(3) <sup>#2</sup>       | 1.391(10)  |
| C(4)-C(5)                     | 1.362(8)   |
| C(4)-S(2) <sup>#2</sup>       | 1.721(3)   |
| C(6)-N(1)                     | 1.333(6)   |
| C(6)-C(6) <sup>#2</sup>       | 1.390(10)  |
| C(5)-S(3) <sup>#2</sup>       | 1.732(4)   |
| N(1)-C(7)                     | 1.338(7)   |
| C(7)-C(7) <sup>#2</sup>       | 1.358(11)  |
| C(3)-S(1)-C(2)                | 99.7(3)    |
| C(4)-S(2)-C(3)                | 97.1(2)    |
| C(5)-S(3)-C(6)                | 95.5(2)    |
| C(2) <sup>#2</sup> -C(2)-C(1) | 114.7(8)   |
| C(2) <sup>#2</sup> -C(2)-S(1) | 111.4(5)   |
| C(1)-C(2)-S(1)                | 111.5(5)   |
| C(3) <sup>#2</sup> -C(3)-S(2) | 115.76(19) |
| C(3) <sup>#2</sup> -C(3)-S(1) | 128.41(19) |
| S(2)-C(3)-S(1)                | 115.7(3)   |
| C(5)-C(4)-S(2) <sup>#2</sup>  | 122.89(17) |
| C(5)-C(4)-S(2)                | 122.90(17) |
| S(2) <sup>#2</sup> -C(4)-S(2) | 114.2(3)   |
| N(1)-C(6)-C(6) <sup>#2</sup>  | 122.6(3)   |
| N(1)-C(6)-S(3)                | 121.0(4)   |
| C(6) <sup>#2</sup> -C(6)-S(3) | 116.42(17) |
| C(4)-C(5)-S(3)                | 121.93(18) |
| C(4)-C(5)-S(3) <sup>#2</sup>  | 121.93(18) |
| S(3)-C(5)-S(3) <sup>#2</sup>  | 116.1(4)   |
| C(6)-N(1)-C(7)                | 114.1(5)   |
| N(1)-C(7)-C(7) <sup>#2</sup>  | 123.2(3)   |

Symmetry transformations used to generate equivalent atoms: #1  $-y, x, -z$ ; #2  $-x, -y + 1, z$ .

**Figure S1.** Numbering scheme, S...S and S...N contacts of donor molecules. Symmetry transformations used to generate equivalent atoms: ('):  $-x, 1-y, z$ ; (''):  $-y, 1+x, -z$ ; (''''):  $-1+x, 1=x, -z$ .

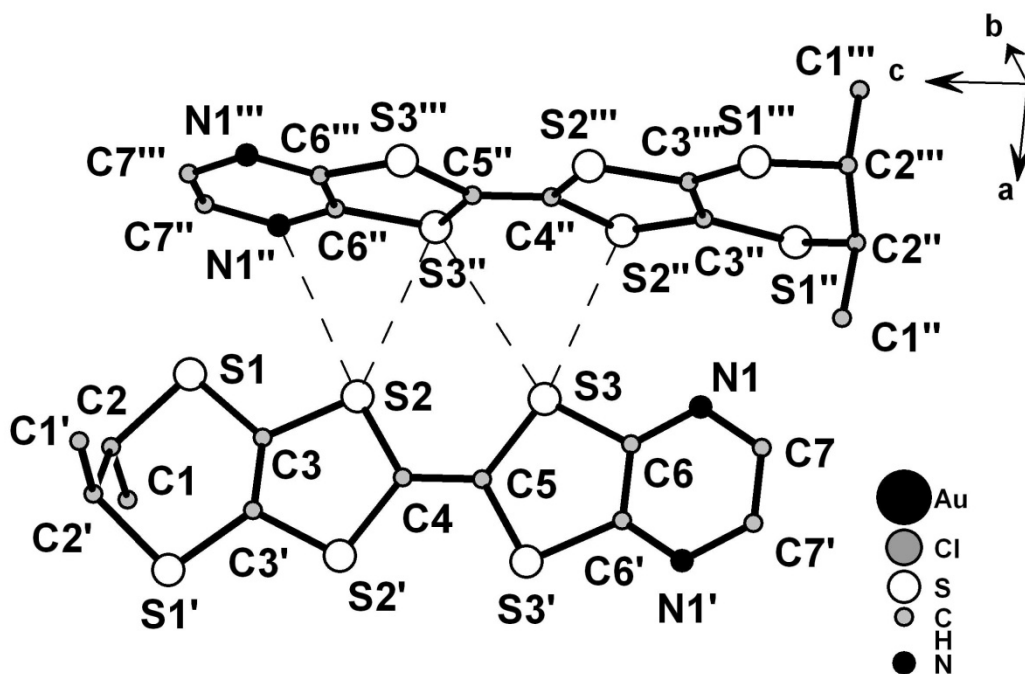

Supplement: s1 [file s1]
